# Supplementary material
Source: MDPI journal article supplement (https://www.mdpi.com/1424-8247/16/5/640)
Supplement: s1 [file s1]

## Supplementary Information for

# Association between Fluoxetine Use and Overall Survival among Patients with Cancer Treated with PD-1/L1 Immunotherapy

Joseph Magagnoli <sup>1,2</sup>, Siddharth Narendran <sup>3,4</sup>, Felipe Pereira <sup>3,4</sup>, Tammy H. Cummings <sup>1,2</sup>, James W. Hardin <sup>1,5</sup>, S. Scott Sutton <sup>1,2,\*</sup> and Jayakrishna Ambati <sup>3,4,6,7,\*</sup>

<sup>1</sup> Dorn Research Institute, Columbia VA Health Care System, Columbia, SC 29209, USA; magagnol@mailbox.sc.edu (J.M.); harris68@mailbox.sc.edu (T.H.C.); jhardin@mailbox.sc.edu (J.W.H.)

<sup>2</sup> Department of Clinical Pharmacy and Outcomes Sciences, College of Pharmacy, University of South Carolina, Columbia, SC, 29208, USA

<sup>3</sup> Center for Advanced Vision Science, University of Virginia School of Medicine, Charlottesville, VA 22903, USA; siddhu\_12345@yahoo.com (S.N.); felipe.oft@gmail.com (F.P.)

<sup>4</sup> Department of Ophthalmology, University of Virginia School of Medicine, Charlottesville, VA 22903, USA

<sup>5</sup> Department of Epidemiology & Biostatistics, University of South Carolina, Columbia, SC 29208, USA

<sup>6</sup> Department of Pathology, University of Virginia School of Medicine, Charlottesville, VA 22903, USA

<sup>7</sup> Department of Microbiology, Immunology, and Cancer Biology, University of Virginia School of Medicine, Charlottesville, VA 22903, USA

\* Correspondence: ja9qr@virginia.edu (J.A.); sutton@cop.sc.edu (S.S.S.)

**Supplementary Table S1. Baseline characteristics.**

|                               | Variable               | PD-1/L1<br>alone N=2282 | FLX +PD-<br>1/PD-L1<br>exposed<br>N=34 | P<br>value | Standardized<br>difference |
|-------------------------------|------------------------|-------------------------|----------------------------------------|------------|----------------------------|
| Age                           |                        | 68.07(9.23)             | 68.65(11.24)                           | 0.749      | 0.062                      |
| Race                          | Black                  | 423(18.54%)             | 5(14.71%)                              | 0.603      | 0.099                      |
|                               | Other/unknown          | 87(3.81%)               | #(<10%)                                |            | 0.108                      |
|                               | White                  | 1772(77.65%)            | 27(79.41%)                             |            | 0.042                      |
| Sex                           | Female                 | 53(2.32%)               | 0(0%)                                  | 1          | 0.155                      |
|                               | Male                   | 2229(97.68%)            | 34(100%)                               | 1          | 0.155                      |
| BMI                           | <18.5                  | 159(6.97%)              | #(<10%)                                | 0.877      | 0.159                      |
|                               | 18.5-24.9              | 844(36.99%)             | 14(41.18%)                             |            | 0.087                      |
|                               | 25-29.9                | 722(31.64%)             | 10(29.41%)                             |            | 0.048                      |
|                               | 30+                    | 547(23.97%)             | 9(26.47%)                              |            | 0.059                      |
|                               | Missing                | 10(0.44%)               | 0(0%)                                  |            | 0.067                      |
| Depression                    |                        | 544(23.84%)             | 18(52.94%)                             | <0.001     | 0.679                      |
| Charlson                      |                        | 8.45(3.28)              | 8.56(2.78)                             | 0.402      | 0.034                      |
| SEER summary stage            | Distant metastasis     | 982(43.03%)             | 15(44.12%)                             | 0.816      | 0.022                      |
|                               | Localized              | 392(17.18%)             | 7(20.59%)                              |            | 0.09                       |
|                               | Regional               | 908(39.79%)             | 12(35.29%)                             |            | 0.092                      |
| ECOG performance at diagnosis | ECOG 0                 | 924(40.49%)             | 13(38.24%)                             | 0.99       | 0.046                      |
|                               | ECOG 1                 | 1006(44.08%)            | 16(47.06%)                             |            | 0.06                       |
|                               | ECOG 2                 | 270(11.83%)             | #(<12%)                                |            | 0.002                      |
|                               | ECOG 3                 | 75(3.29%)               | #(<10% %)                              |            | 0.019                      |
|                               | ECOG 4                 | 7(0.31%)                | 0(0%)                                  |            | 0.056                      |
| Cancer type                   | Kidney & other urinary | 196(8.59%)              | #(<10%)                                | 0.571      | 0.008                      |
|                               | LIVER                  | 103(4.51%)              | #(<10%)                                |            | 0.206                      |
|                               | Lung                   | 1575(69.02%)            | 23(67.65%)                             |            | 0.03                       |
|                               | Skin                   | 227(9.95%)              | #(<12%)                                |            | 0.061                      |
|                               | Throat                 | 181(7.93%)              | #(<10%)                                |            | 0.185                      |

|                          |               |               |               |       |       |
|--------------------------|---------------|---------------|---------------|-------|-------|
| Year of PD-1/PD-L1 start |               | 2017.07(1.16) | 2017.03(1.09) | 0.983 | 0.039 |
| Prior radiation          |               | 1016(44.52%)  | 11(32.35%)    | 0.214 | 0.245 |
| Prior chemotherapy       |               | 1503(65.86%)  | 24(70.59%)    | 0.693 | 0.1   |
| Prior surgery            |               | 612(26.82%)   | 11(32.35%)    | 0.598 | 0.125 |
| Total prior treatment    | 1             | 1069(46.84%)  | 16(47.06%)    | 1     | 0.004 |
|                          | 2             | 944(41.37%)   | 15(44.12%)    |       | 0.056 |
|                          | 3             | 58(2.54%)     | 0(0%)         |       | 0.163 |
|                          | None          | 211(9.25%)    | #(<10%)       |       | 0.015 |
| PD-1/PD-L1               | Atezolizumab  | 64(2.8%)      | #(<10%)       | 0.68  | 0.008 |
|                          | Avelumab      | 5(0.22%)      | 0(0%)         |       | 0.047 |
|                          | Durvalumab    | 77(3.37%)     | #(<10%)       |       | 0.138 |
|                          | Nivolumab     | 1472(64.5%)   | 21(61.76%)    |       | 0.057 |
|                          | Pembrolizumab | 664(29.1%)    | 10(29.41%)    |       | 0.007 |

---

**# indicates masked cell sample**

**Supplementary Table S2.** PS weighted baseline characteristics.

| Variable                                     |                        | PD-1/L1<br>alone | FLX<br>+PD-<br>1/L1<br>exposed | Standardized<br>difference |
|----------------------------------------------|------------------------|------------------|--------------------------------|----------------------------|
| Age                                          |                        | 68.074           | 68.576                         | 0.054                      |
| Race                                         | Black                  | 19%              | 15%                            | 0.105                      |
|                                              | Other/unknown          | 4%               | 6%                             | 0.087                      |
|                                              | White                  | 78%              | 80%                            | 0.058                      |
| Sex                                          | Female                 | 2%               | 0%                             | 0.155                      |
|                                              | Male                   | 98%              | 100%                           | 0.155                      |
| BMI                                          | <18.5                  | 7%               | 3%                             | 0.166                      |
|                                              | 18.5-24.9              | 37%              | 40%                            | 0.057                      |
|                                              | 25-29.9                | 32%              | 32%                            | 0.001                      |
|                                              | 30+                    | 24%              | 26%                            | 0.046                      |
|                                              | Missing                | 0%               | 0%                             | 0.067                      |
| Depression                                   |                        | 24%              | 52%                            | 0.643                      |
| Charlson                                     |                        | 8.447            | 8.577                          | 0.04                       |
| SEER summary stage                           | Distant metastasis     | 43%              | 46%                            | 0.052                      |
|                                              | Localized              | 17%              | 20%                            | 0.072                      |
|                                              | Regional               | 40%              | 35%                            | 0.109                      |
| ECOG performance at diagnosis                | ECOG 0                 | 41%              | 37%                            | 0.066                      |
|                                              | ECOG 1                 | 44%              | 49%                            | 0.091                      |
|                                              | ECOG 2                 | 12%              | 11%                            | 0.016                      |
|                                              | ECOG 3                 | 3%               | 3%                             | 0.025                      |
|                                              | ECOG 4                 | 0%               | 0%                             | 0.056                      |
| Cancer type                                  | Kidney & other urinary | 9%               | 9%                             | 0.001                      |
|                                              | Liver                  | 5%               | 8%                             | 0.183                      |
|                                              | Lung                   | 69%              | 69%                            | 0.005                      |
|                                              | Skin                   | 10%              | 11%                            | 0.038                      |
|                                              | Throat                 | 8%               | 3%                             | 0.193                      |
| Year of PD-1/PD-L1 start                     |                        | 2017.074         | 2016.996                       | 0.067                      |
| PD-1/PD-L1                                   | Atezolizumab           | 3%               | 3%                             | 0.006                      |
|                                              | Avelumab               | 0%               | 0%                             | 0.047                      |
|                                              | Durvalumab             | 3%               | 6%                             | 0.117                      |
|                                              | Nivolumab              | 65%              | 64%                            | 0.015                      |
|                                              | Pembrolizumab          | 29%              | 28%                            | 0.024                      |
| Total prior treatment (radiation/chemo/surg) | 1                      | 47%              | 48%                            | 0.02                       |
|                                              | 2                      | 41%              | 44%                            | 0.049                      |
|                                              | 3                      | 3%               | 0%                             | 0.163                      |
|                                              | None                   | 9%               | 8%                             | 0.03                       |

**Supplementary Table 3. Matched sample characteristics.**

|                                                 | Variable           | PD-1/L1<br>alone N=68 | FLX+PD-1/L1<br>N=34 | P.value | Standardized<br>difference |
|-------------------------------------------------|--------------------|-----------------------|---------------------|---------|----------------------------|
| Age                                             |                    | 68.32(6.34)           | 68.65(11.24)        | 0.639   | 0.035                      |
| Race                                            | Black              | 6(8.82%)              | 5(14.71%)           | 0.699   | 0.183                      |
|                                                 | Other/Unknown      | #(#)                  | #(#)                | 0.699   | 0                          |
|                                                 | White              | 58(85.29%)            | 27(79.41%)          | 0.699   | 0.155                      |
| Sex                                             | Female             | 0(0%)                 | 0(0%)               | 1       | 0                          |
|                                                 | Male               | 68(100%)              | 34(100%)            | 1       | 0                          |
| BMI                                             | <18.5              | 0(0%)                 | #(#)                | 0.675   | 0.246                      |
|                                                 | 18.5-24.9          | 30(44.12%)            | 14(41.18%)          | 0.675   | 0.059                      |
|                                                 | 25-29.9            | 19(27.94%)            | 10(29.41%)          | 0.675   | 0.033                      |
|                                                 | 30+                | 19(27.94%)            | 9(26.47%)           | 0.675   | 0.033                      |
|                                                 | Missing            | 0(0%)                 | 0(0%)               | 0.675   | 0                          |
| Depression                                      |                    | 16(23.53%)            | 18(52.94%)          | 0.006   | 0.635                      |
| Charlson                                        |                    | 8.53(3.41)            | 8.56(2.78)          | 0.583   | 0.009                      |
| Seer summary stage                              | Distant metastasis | 36(52.94%)            | 15(44.12%)          | 0.563   | 0.177                      |
|                                                 | Localized          | 9(13.24%)             | 7(20.59%)           | 0.563   | 0.197                      |
|                                                 | Regional           | 23(33.82%)            | 12(35.29%)          | 0.563   | 0.031                      |
| ECOG performance at diagnosis                   | ECOG 0             | 21(30.88%)            | 13(38.24%)          | 0.859   | 0.155                      |
|                                                 | ECOG 1             | 32(47.06%)            | 16(47.06%)          | 0.859   | 0                          |
|                                                 | ECOG 2             | 12(17.65%)            | #(#)                | 0.859   | 0.167                      |
|                                                 | ECOG 3             | #(#)                  | #(#)                | 0.859   | 0.078                      |
|                                                 | ECOG 4             | 0(0%)                 | 0(0%)               | 0.859   | 0                          |
| Cancer type                                     | Kidney & Other     |                       |                     |         |                            |
|                                                 | Urinary            | 5(7.35%)              | #(#)                | 1       | 0.054                      |
|                                                 | Liver              | 8(11.76%)             | #(#)                | 1       | 0.097                      |
|                                                 | Lung               | 46(67.65%)            | 23(67.65%)          | 1       | 0                          |
|                                                 | Skin               | 7(10.29%)             | #(#)                | 1       | 0.047                      |
|                                                 | Throat             | #(#)                  | #(#)                | 1       | 0                          |
| Year of PD-1/PD-L1 start                        |                    | 2017.01(1.07)         | 2017.03(1.09)       | 0.767   | 0                          |
| Prior radiation                                 |                    | 30(44.12%)            | 11(32.35%)          | 0.353   | 0.244                      |
| Prior chemotherapy                              |                    | 51(75%)               | 24(70.59%)          | 0.812   | 0.099                      |
| Prior surgery                                   |                    | 14(20.59%)            | 11(32.35%)          | 0.29    | 0.269                      |
| Total prior treatment<br>(radiation/chemo/surg) | 1                  | 27(39.71%)            | 16(47.06%)          | 0.826   | 0.149                      |
|                                                 | 2                  | 34(50%)               | 15(44.12%)          | 0.826   | 0.118                      |
|                                                 | 3                  | 0(0%)                 | 0(0%)               | 0.826   | 0                          |
|                                                 | None               | 7(10.29%)             | #(#)                | 0.826   | 0.05                       |
| PD-1/PD-L1                                      | Atezolizumab       | #(#)                  | #(#)                | 0.943   | 0                          |
|                                                 | Avelumab           | 0(0%)                 | 0(0%)               | 0.943   | 0                          |
|                                                 | Durvalumab         | #(#)                  | #(#)                | 0.943   | 0                          |
|                                                 | Nivolumab          | 46(67.65%)            | 21(61.76%)          | 0.943   | 0.123                      |
|                                                 | Pembrolizumab      | 16(23.53%)            | 10(29.41%)          | 0.943   | 0.134                      |

# indicates masked cell sample

**Supplementary Table S4.** PS weighted baseline characteristics: Sertraline +PD-1/PD-L1 vs. PD-1/L1 alone

| Variable                 |                | PD-1/L1<br>alone | Sertraline<br>+PD-1/L1 | Standardized<br>difference |
|--------------------------|----------------|------------------|------------------------|----------------------------|
| Age                      |                | 68.109           | 67.422                 | 0.074                      |
| Race                     | Black          | 19%              | 18%                    | 0.027                      |
|                          | Other/unknown  | 4%               | 5%                     | 0.062                      |
|                          | White          | 78%              | 77%                    | 0.004                      |
| Sex                      | Female         | 2%               | 2%                     | 0.045                      |
|                          | Male           | 98%              | 98%                    | 0.045                      |
| BMI                      | <18.5          | 7%               | 7%                     | 0.017                      |
|                          | 18.5-24.9      | 37%              | 39%                    | 0.041                      |
|                          | 25-29.9        | 31%              | 32%                    | 0.012                      |
|                          | 30+            | 24%              | 22%                    | 0.038                      |
|                          | Missing        | 0%               | 0%                     | 0.069                      |
| Depression               |                | 24%              | 27%                    | 0.06                       |
| Charlson                 |                | 8.447            | 8.374                  | 0.022                      |
| Seer summary stage       | Distant        | 43%              | 42%                    | 0.036                      |
|                          | Localized      | 17%              | 19%                    | 0.053                      |
|                          | Regional       | 40%              | 39%                    | 0.004                      |
| ECOG performance at      | ECOG 0         | 41%              | 42%                    | 0.024                      |
|                          | ECOG 1         | 44%              | 43%                    | 0.016                      |
|                          | ECOG 2         | 12%              | 12%                    | 0.01                       |
|                          | ECOG 3         | 3%               | 3%                     | 0.022                      |
|                          | ECOG 4         | 0%               | 0%                     | 0.058                      |
| Cancer type              | Kidney & other | 9%               | 11%                    | 0.069                      |
|                          | Liver          | 5%               | 5%                     | 0.013                      |
|                          | Lung           | 69%              | 69%                    | 0                          |
|                          | Skin           | 10%              | 9%                     | 0.027                      |
|                          | Throat         | 8%               | 7%                     | 0.052                      |
| Year of PD-1/PD-L1 start |                | 2017.072         | 2017.157               | 0.074                      |
| Total prior treatment    | 1              | 47%              | 45%                    | 0.045                      |
|                          | 2              | 42%              | 45%                    | 0.064                      |
|                          | 3              | 3%               | 2%                     | 0.06                       |
|                          | None           | 9%               | 9%                     | 0.001                      |
| PD-1/PD-L1               | Atezolizumab   | 3%               | 3%                     | 0.028                      |
|                          | Avelumab       | 0%               | 0%                     | 0.048                      |
|                          | Durvalumab     | 4%               | 3%                     | 0.047                      |
|                          | Nivolumab      | 64%              | 65%                    | 0.013                      |
|                          | Pembrolizumab  | 29%              | 29%                    | 0.001                      |

**Supplementary Table S5.** PS weighted baseline characteristics: Venlafaxine +PD-1/PD-L1 vs. PD-1/PD-L1 alone

|                          |                      | PD-1/L1<br>alone | Venlafaxine +<br>PD-1/L1 | Standardized<br>difference |
|--------------------------|----------------------|------------------|--------------------------|----------------------------|
| Age                      |                      | 68.069           | 69.289                   | 0.132                      |
| Race                     | Black                | 19%              | 4%                       | 0.375                      |
|                          | Other/Unknown        | 4%               | 1%                       | 0.15                       |
|                          | White                | 78%              | 95%                      | 0.419                      |
| Sex                      | Female               | 2%               | 2%                       | 0.003                      |
|                          | Male                 | 98%              | 98%                      | 0.003                      |
| BMI                      | <18.5                | 7%               | 0%                       | 0.275                      |
|                          | 18.5-24.9            | 37%              | 40%                      | 0.056                      |
|                          | 25-29.9              | 32%              | 26%                      | 0.12                       |
|                          | 30+                  | 24%              | 34%                      | 0.24                       |
|                          | Missing              | 0%               | 0%                       | 0.066                      |
| Depression               |                      | 24%              | 25%                      | 0.01                       |
| Charlson                 |                      | 8.447            | 9.68                     | 0.377                      |
| SEER summary stage       | Distant metastasis   | 43%              | 29%                      | 0.282                      |
|                          | Localized            | 17%              | 26%                      | 0.244                      |
|                          | Regional             | 40%              | 44%                      | 0.097                      |
| ECOG performance at      | ECOG 0               | 40%              | 53%                      | 0.259                      |
|                          | ECOG 1               | 44%              | 30%                      | 0.28                       |
|                          | ECOG 2               | 12%              | 9%                       | 0.1                        |
|                          | ECOG 3               | 3%               | 8%                       | 0.264                      |
|                          | ECOG 4               | 0%               | 0%                       | 0.056                      |
| Cancer type              | Kidney/other urinary | 2017.069         | 2017.23                  | 0.139                      |
|                          | Liver                | 9%               | 11%                      | 0.08                       |
|                          | Lung                 | 5%               | 0%                       | 0.221                      |
|                          | Skin                 | 69%              | 71%                      | 0.039                      |
|                          | Throat               | 10%              | 17%                      | 0.234                      |
| Year of PD-1/PD-L1 start |                      | 8%               | 1%                       | 0.24                       |
| Total prior treatment    | 1                    | 47%              | 60%                      | 0.265                      |
|                          | 2                    | 41%              | 34%                      | 0.153                      |
|                          | 3                    | 3%               | 0%                       | 0.163                      |
|                          | None                 | 9%               | 6%                       | 0.108                      |
| PD-1/PD-L1               | Atezolizumab         | 3%               | 1%                       | 0.104                      |
|                          | Avelumab             | 0%               | 0%                       | 0.047                      |
|                          | Durvalumab           | 3%               | 1%                       | 0.133                      |
|                          | Nivolumab            | 65%              | 73%                      | 0.173                      |
|                          | Pembrolizumab        | 29%              | 25%                      | 0.087                      |

**Supplementary Table S6.** PS weighted Cox model: Sertraline +PD-1/L1 vs. PD-1/L1 alone

| Variable                                      | All follow up HR(95% CI) |
|-----------------------------------------------|--------------------------|
| Sertraline +PD-1/L1 vs. PD-1/L1 alone         | 1.069 (0.829-1.38)       |
| Age                                           | 1.007 (0.999-1.014)      |
| Race: Other/unknown vs. Black                 | 2.618 (1.642-4.174)      |
| White vs. Black                               | 1.41 (1.11-1.793)        |
| Sex: Male vs. Female                          | 0.9 (0.597-1.355)        |
| BMI: 18.5-24.9 vs <18.5                       | 0.774 (0.584-1.026)      |
| 25-29.9 vs. <18.5                             | 0.746 (0.567-0.981)      |
| 30+ vs. <18.5                                 | 0.737 (0.543-1.001)      |
| Missing vs. <18.5                             | 1.486 (0.435-5.079)      |
| Depression                                    | 1.033 (0.858-1.244)      |
| Charlson                                      | 1.055 (1.028-1.081)      |
| SEER summary: Localized vs distant metastasis | 0.692 (0.521-0.92)       |
| Regional vs distant metastasis                | 0.883 (0.701-1.113)      |
| ECOG performance at diagnosis ECOG 1 vs. 0    | 1.024 (0.833-1.259)      |
| ECOG 2 vs. 0                                  | 1.434 (1.123-1.831)      |
| ECOG 3 vs. 0                                  | 1.787 (1.282-2.491)      |
| ECOG 4 vs. 0                                  | 1.885 (0.71-5.005)       |
| Liver vs Kidney/other urinary                 | 1.782 (0.974-3.261)      |
| Lung vs Kidney/other urinary                  | 2.014 (1.268-3.198)      |
| Skin vs Kidney/other urinary                  | 0.888 (0.469-1.683)      |
| Throat vs Kidney/other urinary                | 2.542 (1.442-4.483)      |
| Year of PD-1/PD-L1 start                      | 0.894 (0.82-0.975)       |
| Total Prior Tx 2 vs. 1                        | 0.917 (0.743-1.133)      |
| 3 vs. 1                                       | 1.069 (0.711-1.607)      |
| 0 vs. 1                                       | 0.668 (0.487-0.917)      |
| Avelumab                                      | 1.502 (0.258-8.757)      |
| Durvalumab                                    | 0.798 (0.276-2.307)      |
| Nivolumab                                     | 1.322 (0.71-2.462)       |
| Pembrolizumab                                 | 1.12 (0.588-2.134)       |

**Supplementary Table S7.** PS weighted Cox model: Venlafaxine +PD-1/L1 vs. PD-1/L1 alone

| Variable                                      | All follow up HR(95% CI) |
|-----------------------------------------------|--------------------------|
| Venlafaxine                                   | 1.162 (0.76-1.776)       |
| Age                                           | 0.982 (0.964-1)          |
| Race: Other/unknown vs. Black                 | 1.665 (1.098-2.525)      |
| White vs. Black                               | 1.506 (1.222-1.856)      |
| Sex: Male vs. Female                          | 2.389 (0.791-7.211)      |
| BMI: 18.5-24.9 vs <18.5                       | 0.868 (0.68-1.108)       |
| 25-29.9 vs. <18.5                             | 0.526 (0.382-0.722)      |
| 30+ vs. <18.5                                 | 0.602 (0.439-0.825)      |
| Missing vs. <18.5                             | 1.452 (0.437-4.829)      |
| Depression                                    | 0.786 (0.614-1.007)      |
| Charlson                                      | 1.066 (1.04-1.092)       |
| SEER summary: Localized vs distant metastasis | 1.024 (0.663-1.58)       |
| Regional vs distant metastasis                | 1.242 (1.008-1.531)      |
| ECOG performance at diagnosis: ECOG 1 vs. 0   | 1.178 (0.935-1.484)      |
| ECOG 2 vs. 0                                  | 1.441 (1.066-1.948)      |
| ECOG 3 vs. 0                                  | 0.368 (0.113-1.198)      |
| ECOG 4 vs. 0                                  | 2.014 (0.741-5.471)      |
| Liver vs Kidney/other urinary                 | 3.86 (1.357-10.983)      |
| Lung vs Kidney/other urinary                  | 5.016 (1.707-14.742)     |
| Skin vs Kidney/other urinary                  | 1.696 (0.551-5.221)      |
| Throat vs Kidney/other urinary                | 3.374 (1.169-9.738)      |
| Year of PD-1/PD-L1 start                      | 0.868 (0.772-0.975)      |
| Total Prior Tx 2 vs. 1                        | 0.959 (0.796-1.155)      |
| 3 vs. 1                                       | 0.857 (0.587-1.253)      |
| 0 vs. 1                                       | 0.884 (0.618-1.263)      |
| Avelumab                                      | 0.688 (0.106-4.453)      |
| Durvalumab                                    | 0.14 (0.075-0.263)       |
| Nivolumab                                     | 0.708 (0.442-1.132)      |
| Pembrolizumab                                 | 0.381 (0.229-0.633)      |

**Supplementary Table S8.** Baseline characteristics among patients without PD-1/L1 therapy

|                   | Variable       | FLX unexposed<br>N=42699 | FLX exposed<br>N=828 | P-<br>value | Standardized<br>difference |
|-------------------|----------------|--------------------------|----------------------|-------------|----------------------------|
| Age               |                | 67.29(10.45)             | 65.46(10.18)         | <0.001      | 0.175                      |
| Race              | BLACK          | 6322(14.81%)             | 84(10.14%)           | <0.001      | 0.132                      |
|                   | Other/unknown  | 3105(7.27%)              | 69(8.33%)            |             | 0.041                      |
|                   | White          | 33272(77.92%)            | 675(81.52%)          |             | 0.087                      |
| Sex               | Female         | 833(1.95%)               | 37(4.47%)            | <0.001      | 0.18                       |
|                   | Male           | 41866(98.05%)            | 791(95.53%)          |             | 0.18                       |
| BMI               | <18.5          | 2223(5.21%)              | 24(2.9%)             | <0.001      | 0.104                      |
|                   | 18.5-24.9      | 14255(33.38%)            | 216(26.09%)          |             | 0.155                      |
|                   | 25-29.9        | 13762(32.23%)            | 277(33.45%)          |             | 0.026                      |
|                   | 30+            | 12041(28.2%)             | 308(37.2%)           |             | 0.2                        |
|                   | Missing        | 418(0.98%)               | #(<10%)              |             | 0.063                      |
| Depression        |                | 12339(28.9%)             | 574(69.32%)          | <0.001      | 0.885                      |
| Charlson          |                | 2.74(2.57)               | 2.96(2.52)           | 0.001       | 0.083                      |
| Seer summary      | Distant        | 13518(31.66%)            | 224(27.05%)          | 0.016       | 0.099                      |
|                   | Localized      | 16516(38.68%)            | 348(42.03%)          |             | 0.069                      |
|                   | Regional       | 12665(29.66%)            | 256(30.92%)          |             | 0.028                      |
| ECOG              | ECOG 0         | 16987(39.78%)            | 349(42.15%)          | 0.05        | 0.048                      |
|                   | ECOG 1         | 15560(36.44%)            | 285(34.42%)          |             | 0.042                      |
|                   | ECOG 2         | 5923(13.87%)             | 132(15.94%)          |             | 0.06                       |
|                   | ECOG 3         | 3456(8.09%)              | 52(6.28%)            |             | 0.067                      |
|                   | ECOG 4         | 773(1.81%)               | 10(1.21%)            |             | 0.045                      |
| Cancer type       | Kidney & other | 4216(9.87%)              | 110(13.29%)          | 0.015       | 0.114                      |
|                   | LIVER          | 4957(11.61%)             | 87(10.51%)           |             | 0.034                      |
|                   | Lung           | 22766(53.32%)            | 439(53.02%)          |             | 0.006                      |
|                   | Skin           | 5055(11.84%)             | 96(11.59%)           |             | 0.008                      |
|                   | Throat         | 5705(13.36%)             | 96(11.59%)           |             | 0.052                      |
| Year of Diagnosis |                | 2012.55(2.95)            | 2012.85(2.9)         | 0.006       | 0.101                      |

**Supplementary Table S9.** PS-weighted baseline characteristics among patients without PD-1/L1 therapy

|                     |                    | FLX       | FLX      | Standardized |
|---------------------|--------------------|-----------|----------|--------------|
|                     |                    | unexposed | exposed  | difference   |
| Age                 |                    | 67.256    | 67.16    | 0.009        |
| Race                | Black              | 15%       | 10%      | 0.13         |
|                     | Other/Unknown      | 7%        | 8%       | 0.027        |
|                     | White              | 78%       | 82%      | 0.094        |
| Sex                 | Female             | 2%        | 2%       | 0.005        |
|                     | Male               | 98%       | 98%      | 0.005        |
| BMI                 | <18.5              | 5%        | 3%       | 0.092        |
|                     | 18.5-24.9          | 33%       | 33%      | 0.014        |
|                     | 25-29.9            | 32%       | 34%      | 0.045        |
|                     | 30+                | 28%       | 30%      | 0.032        |
|                     | Missing            | 1%        | 0%       | 0.088        |
| Depression          |                    | 30%       | 31%      | 0.031        |
| Charlson            |                    | 2.748     | 2.74     | 0.003        |
| Seer summary stage  | Distant metastasis | 32%       | 29%      | 0.049        |
|                     | Localized          | 39%       | 40%      | 0.025        |
|                     | Regional           | 30%       | 31%      | 0.023        |
| ECOG performance at | ECOG 0             | 40%       | 38%      | 0.032        |
|                     | ECOG 1             | 36%       | 40%      | 0.064        |
|                     | ECOG 2             | 14%       | 14%      | 0.001        |
|                     | ECOG 3             | 8%        | 7%       | 0.051        |
|                     | ECOG 4             | 2%        | 2%       | 0.007        |
| Cancer type         | Kidney & other     | 10%       | 9%       | 0.021        |
|                     | LIVER              | 12%       | 9%       | 0.072        |
|                     | Lung               | 53%       | 57%      | 0.073        |
|                     | Skin               | 12%       | 12%      | 0.008        |
|                     | Throat             | 13%       | 13%      | 0.012        |
| Year of Diagnosis   |                    | 2012.557  | 2012.542 | 0.005        |

**Supplementary Table S10.** PS-weighted Cox models. FLX and OS among patients without PD-1/L1 therapy

| Variable                                      | All follow-up HR(95% CI) | 1 year HR(95% CI)   | 2 year HR(95% CI)   |
|-----------------------------------------------|--------------------------|---------------------|---------------------|
| Fluoxetine                                    | 1.069 (0.933-1.223)      | 1.107 (0.939-1.305) | 1.104 (0.954-1.276) |
| Age                                           | 1.016 (1.011-1.021)      | 1.014 (1.007-1.021) | 1.013 (1.007-1.019) |
| Race: Other/unknown vs. Black                 | 1.063 (0.868-1.303)      | 1.098 (0.816-1.476) | 1.128 (0.89-1.429)  |
| WHITE vs. Black                               | 1.067 (0.938-1.213)      | 1.163 (0.947-1.429) | 1.147 (0.967-1.362) |
| sex: Male vs. Female                          | 1.399 (1.044-1.876)      | 1.372 (0.864-2.18)  | 1.533 (0.962-2.443) |
| BMI: 18.5-24.9 vs <18.5                       | 0.794 (0.635-0.992)      | 0.812 (0.623-1.058) | 0.795 (0.627-1.008) |
| 25-29.9 vs. <18.5                             | 0.739 (0.597-0.916)      | 0.732 (0.559-0.957) | 0.755 (0.598-0.952) |
| 30+ vs. <18.5                                 | 0.659 (0.528-0.822)      | 0.66 (0.5-0.872)    | 0.638 (0.5-0.815)   |
| Missing vs. <18.5                             | 1.067 (0.755-1.508)      | 1.234 (0.895-1.702) | 1.122 (0.786-1.601) |
| Depression                                    | 1.004 (0.911-1.107)      | 0.968 (0.857-1.092) | 1 (0.9-1.112)       |
| Charlson                                      | 1.035 (1.013-1.058)      | 1.033 (1.009-1.058) | 1.034 (1.012-1.056) |
| Seer summary: Localized vs distant metastasis | 0.214 (0.179-0.257)      | 0.172 (0.134-0.219) | 0.177 (0.145-0.216) |
| Regional vs distant metastasis                | 0.433 (0.371-0.505)      | 0.387 (0.326-0.46)  | 0.409 (0.352-0.477) |
| ECOG performance at diagnosis ECOG 1vs. 0     | 1.492 (1.308-1.701)      | 1.618 (1.326-1.973) | 1.571 (1.342-1.839) |
| ECOG 2 vs. 0                                  | 2.354 (2.035-2.722)      | 2.638 (2.144-3.247) | 2.569 (2.178-3.029) |
| ECOG 3 vs. 0                                  | 3.33 (2.745-4.038)       | 3.936 (3.061-5.06)  | 3.73 (3.035-4.585)  |
| ECOG 4 vs. 0                                  | 6.046 (4.532-8.066)      | 6.714 (4.865-9.264) | 6.451 (4.793-8.683) |
| LIVER vs Kidney/other urinary                 | 3.084 (2.544-3.74)       | 3.498 (2.583-4.738) | 3.136 (2.537-3.875) |
| Lung s Kidney/other urinary                   | 1.93 (1.627-2.29)        | 2.191 (1.652-2.906) | 1.953 (1.624-2.348) |
| SKIN vs Kidney/other urinary                  | 0.817 (0.655-1.019)      | 0.763 (0.487-1.196) | 0.766 (0.564-1.04)  |
| Throat vs Kidney/other urinary                | 0.989 (0.802-1.219)      | 0.989 (0.692-1.415) | 1.004 (0.782-1.289) |
| Year of cancer diagnosis                      | 0.94 (0.923-0.957)       | 0.975 (0.952-1)     | 0.964 (0.944-0.985) |
